# Supplementary material for: Modeling of the Long-Term Epidemic Dynamics of COVID-19 in the United States
Source: MDPI journal article supplement (doi:10.3390/ijerph18147594), 2021-07-16
Supplement: s1 [file s1]

# Supplementary Materials

## Modeling of the Long-Term Epidemic Dynamics of COVID-19 in the United States

Derek Huang <sup>1</sup>, Huanyu Tao <sup>2</sup>, Qilong Wu <sup>2</sup>, Sheng-You Huang <sup>2,\*</sup> and Yi Xiao <sup>2,\*</sup>

<sup>1</sup> Wuhan Britain-China School, No.10 Gutian Rd., Qiaokou District, Wuhan 430022, China; huangderek04@gmail.com

<sup>2</sup> Institute of Biophysics, School of Physics, Huazhong University of Science and Technology, Wuhan 430074, China; d201980099@hust.edu.cn (H.T.); m201970198@hust.edu.cn (Q.W.)

\* Correspondence: huangsy@hust.edu.cn (S.-Y.H.); yxiao@hust.edu.cn (Y.X.)

**Figure S1**

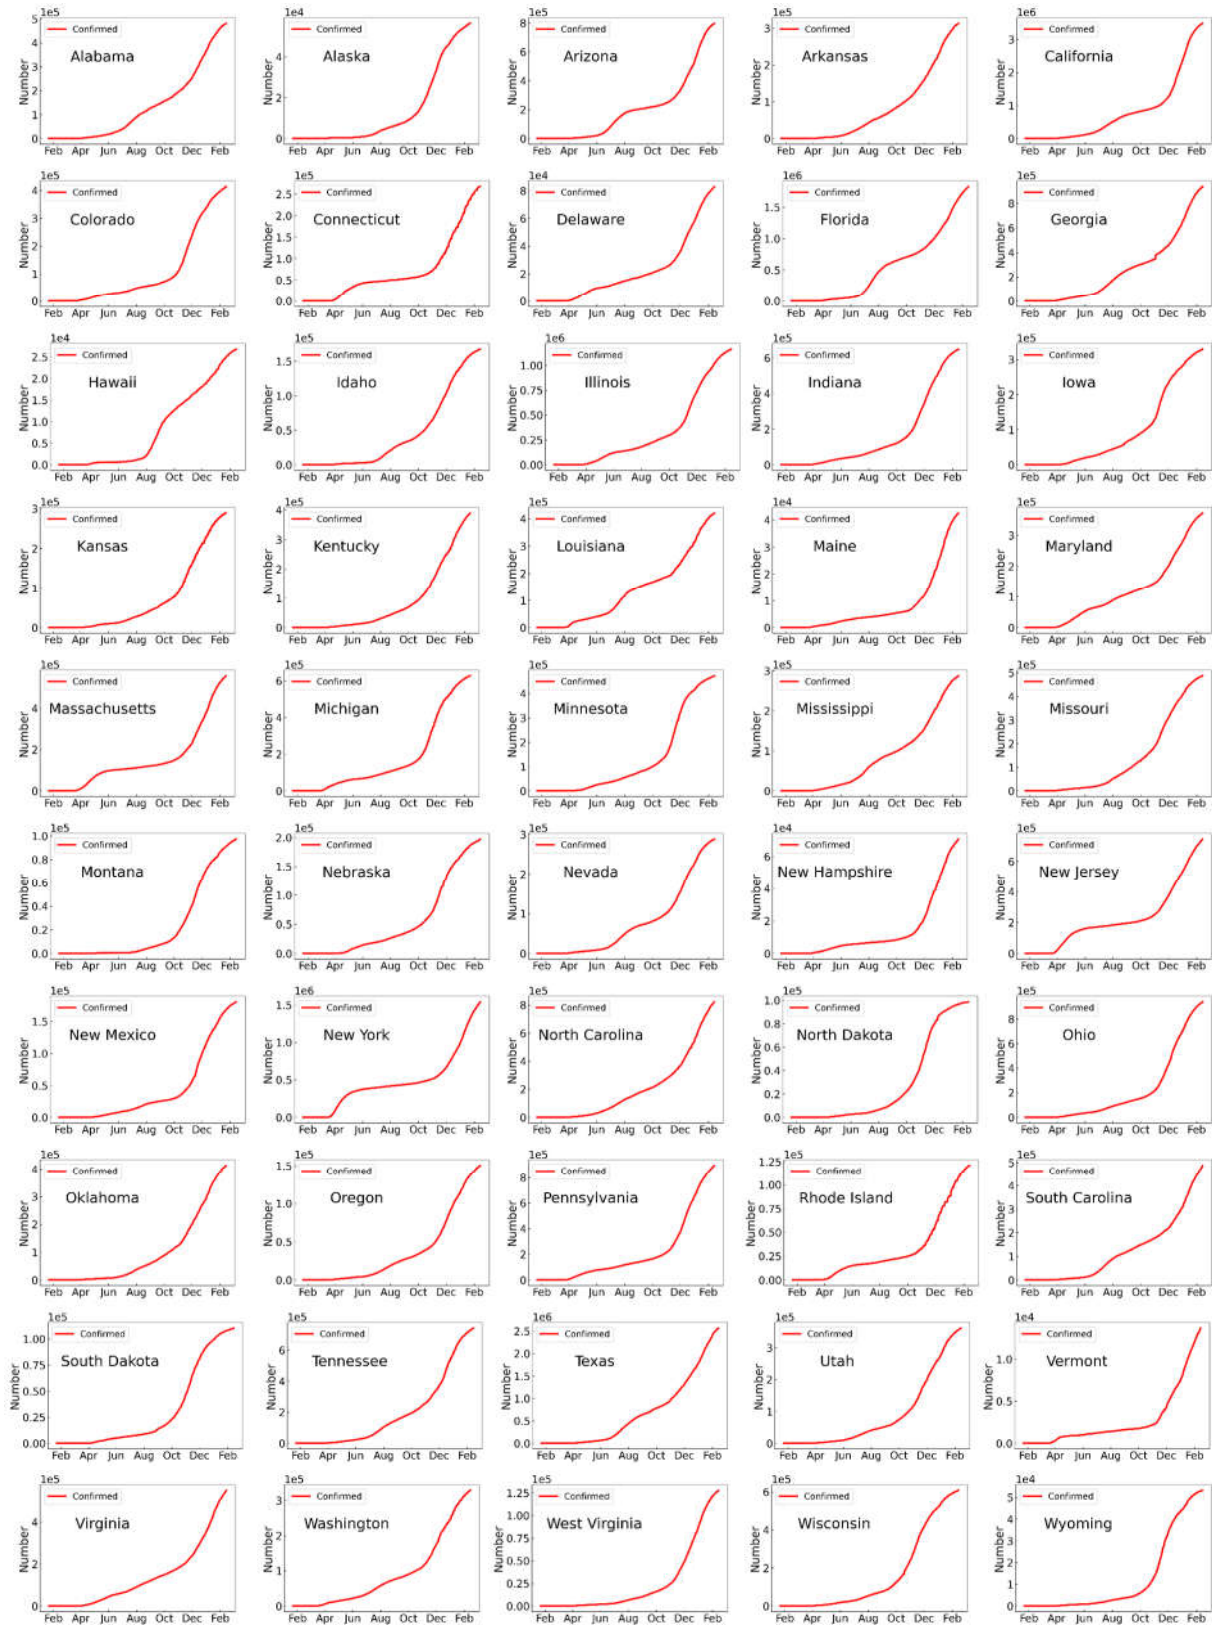

**Figure S1:** The daily confirmed cases of COVID-19 from Jan. 22<sup>nd</sup>, 2020 to Feb 14<sup>th</sup>, 2021 for the 50 states in the US.

**Figure S2**

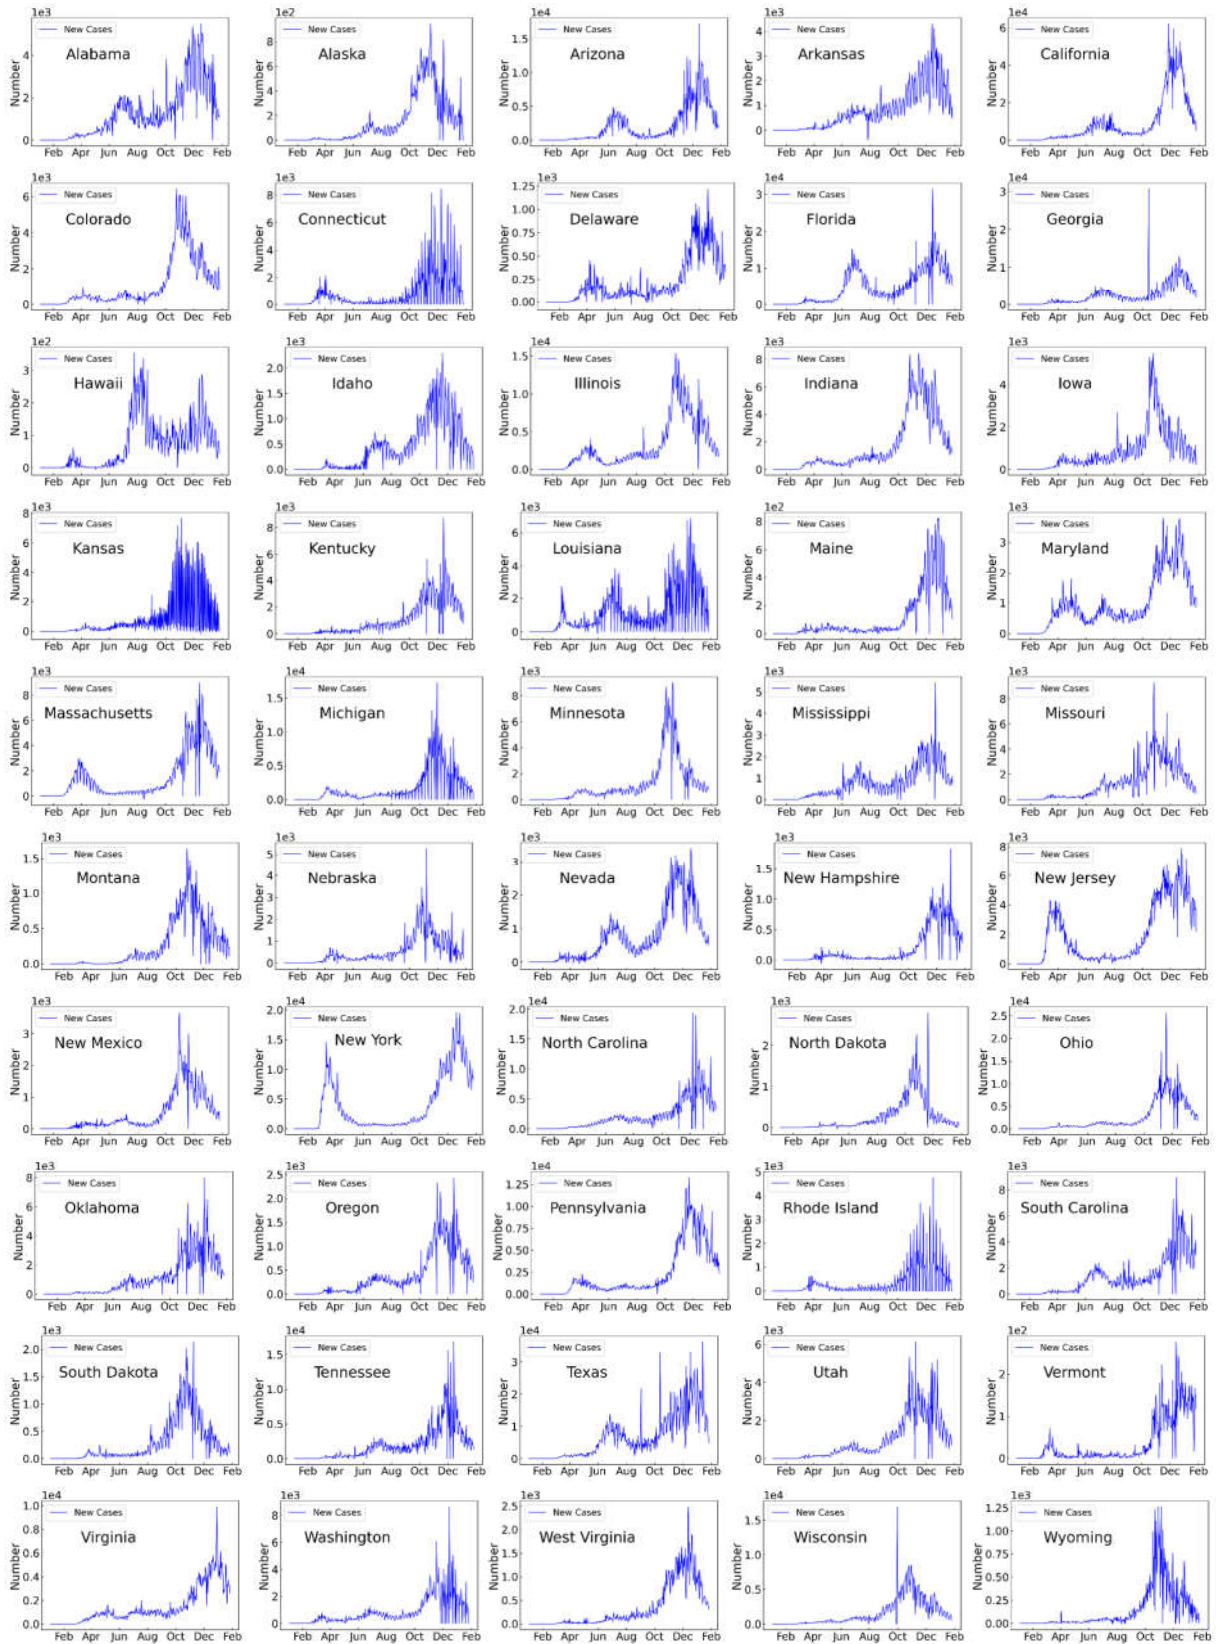

**Figure S2:** The daily new cases of COVID-19 from Jan. 22<sup>nd</sup>, 2020 to Feb 14<sup>th</sup>, 2021 for the 50 states in the US, where the data were calculated from the confirmed data.



**Figure S3**

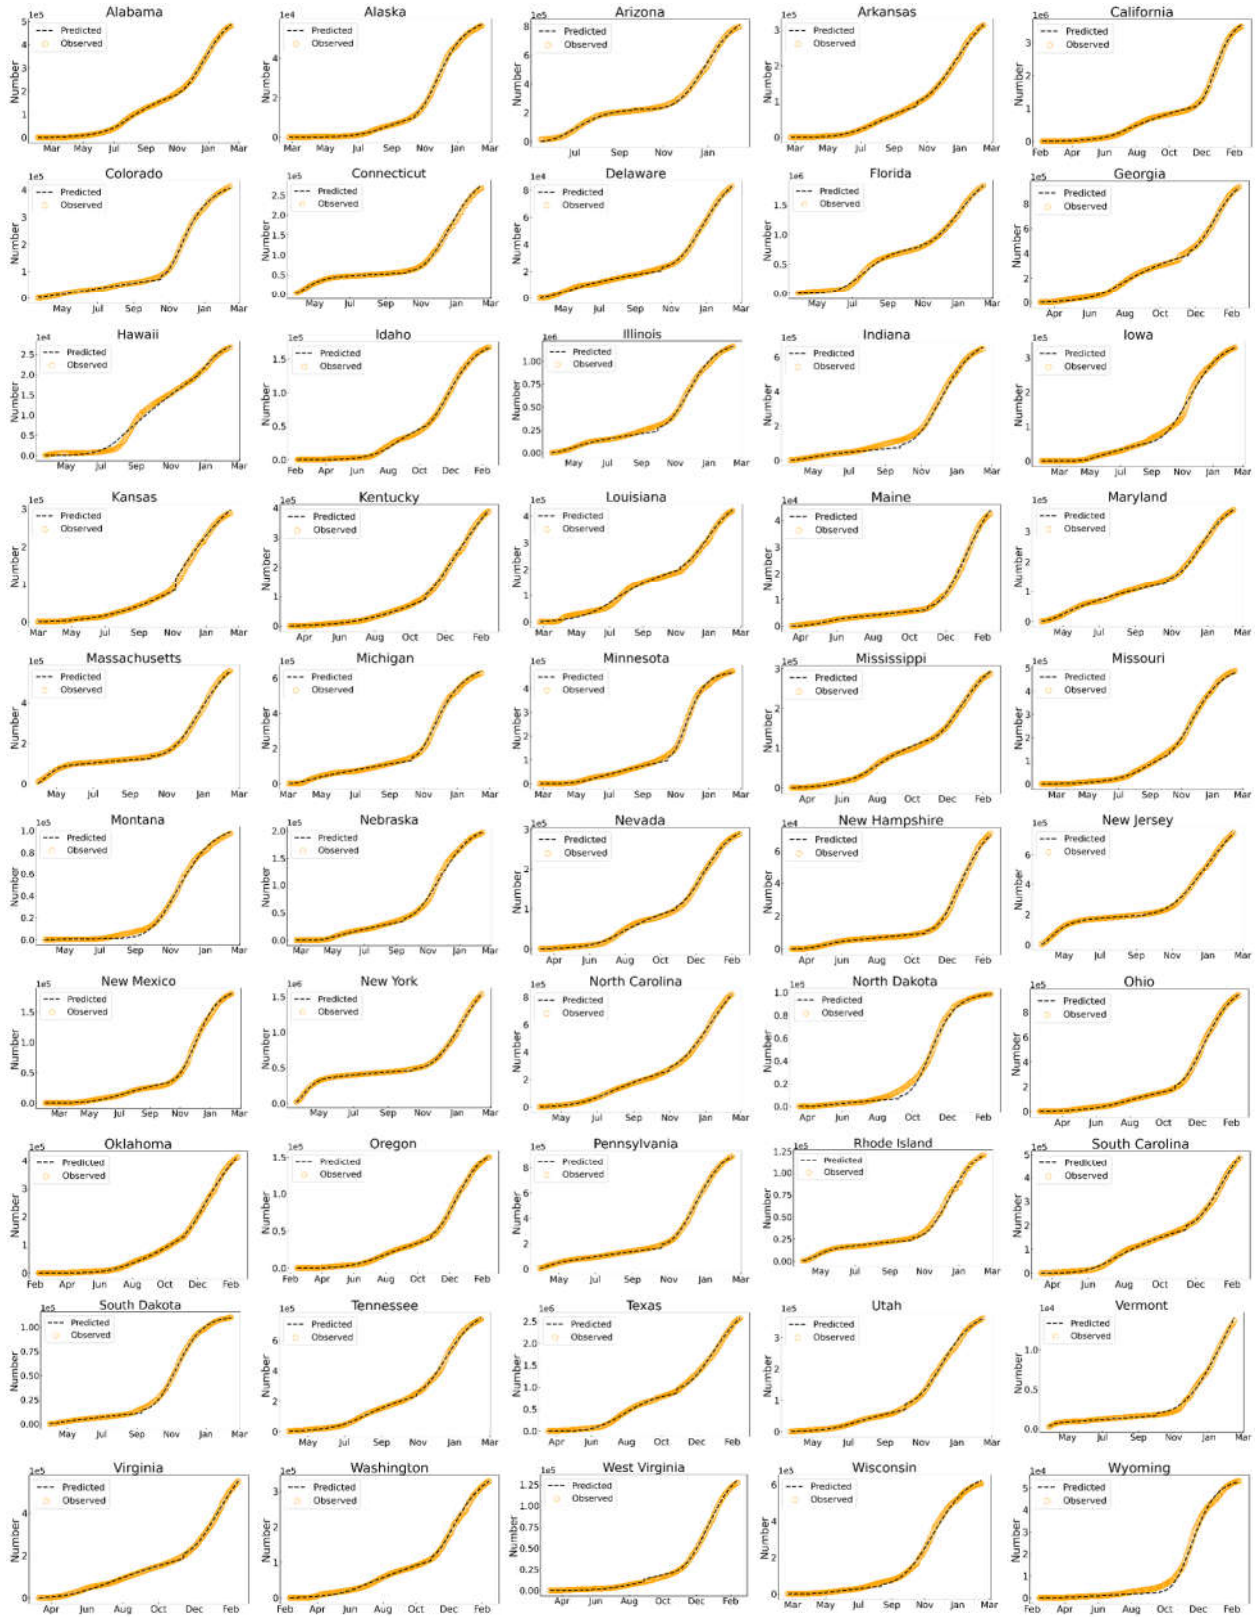

**Figure S3:** The fitting of our T-SIR model to the daily confirmed cases of COVID-19 for the 50 states in the US, where the dashed lines indicate the predicted data of T-SIR model.

**Figure S4**

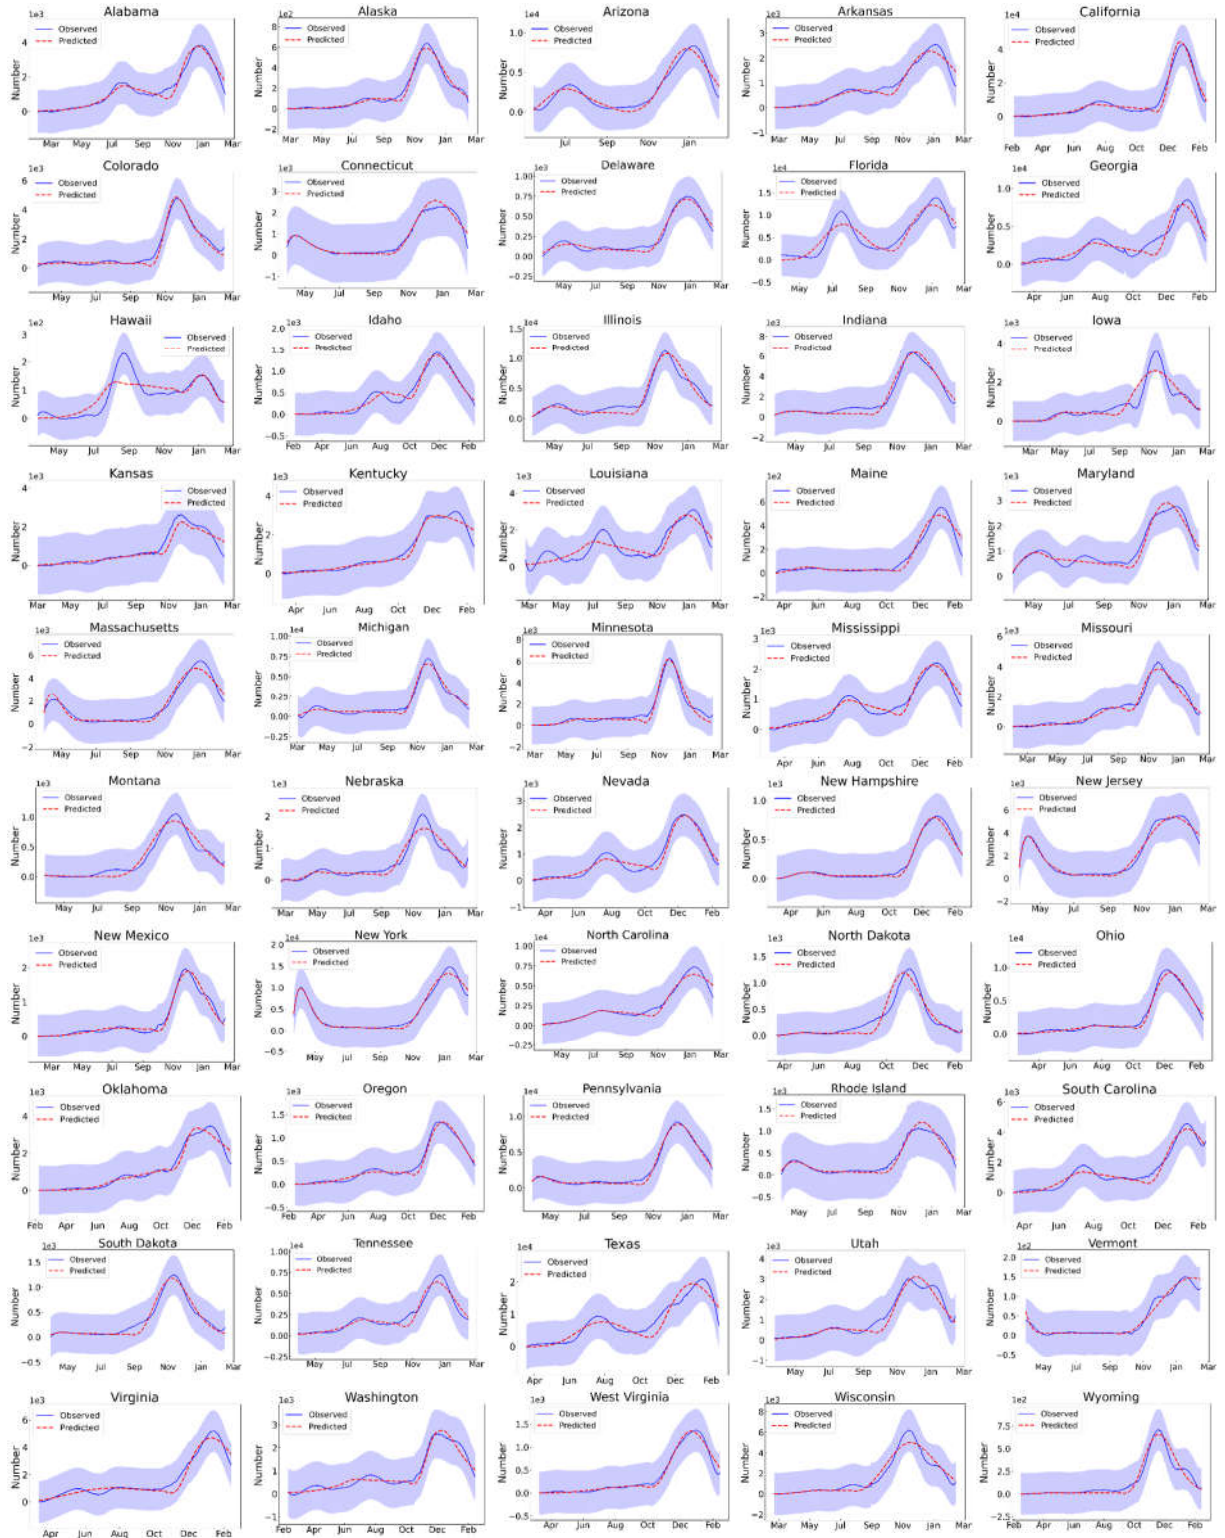

**Figure S4:** The fitting of our T-SIR model to the daily new cases of COVID-19 for the 50 states in the US, where the dashed lines indicate the predicted data of T-SIR model. Data were smoothed using a Savitzky–Golay filter for the daily new cases, where the light-blue shade indicates the standard deviations of reported data.
